# Supplementary material for: Genomes of Ellobius species provide insight into the evolutionary dynamics of mammalian sex chromosomes
Source: HighWire-hosted journal article supplement (doi:10.1101/gr.201665.115), 2016-08-10
Supplement: Supplemental_Figure_S1.pdf [file Supplemental_Figure_S1.pdf]

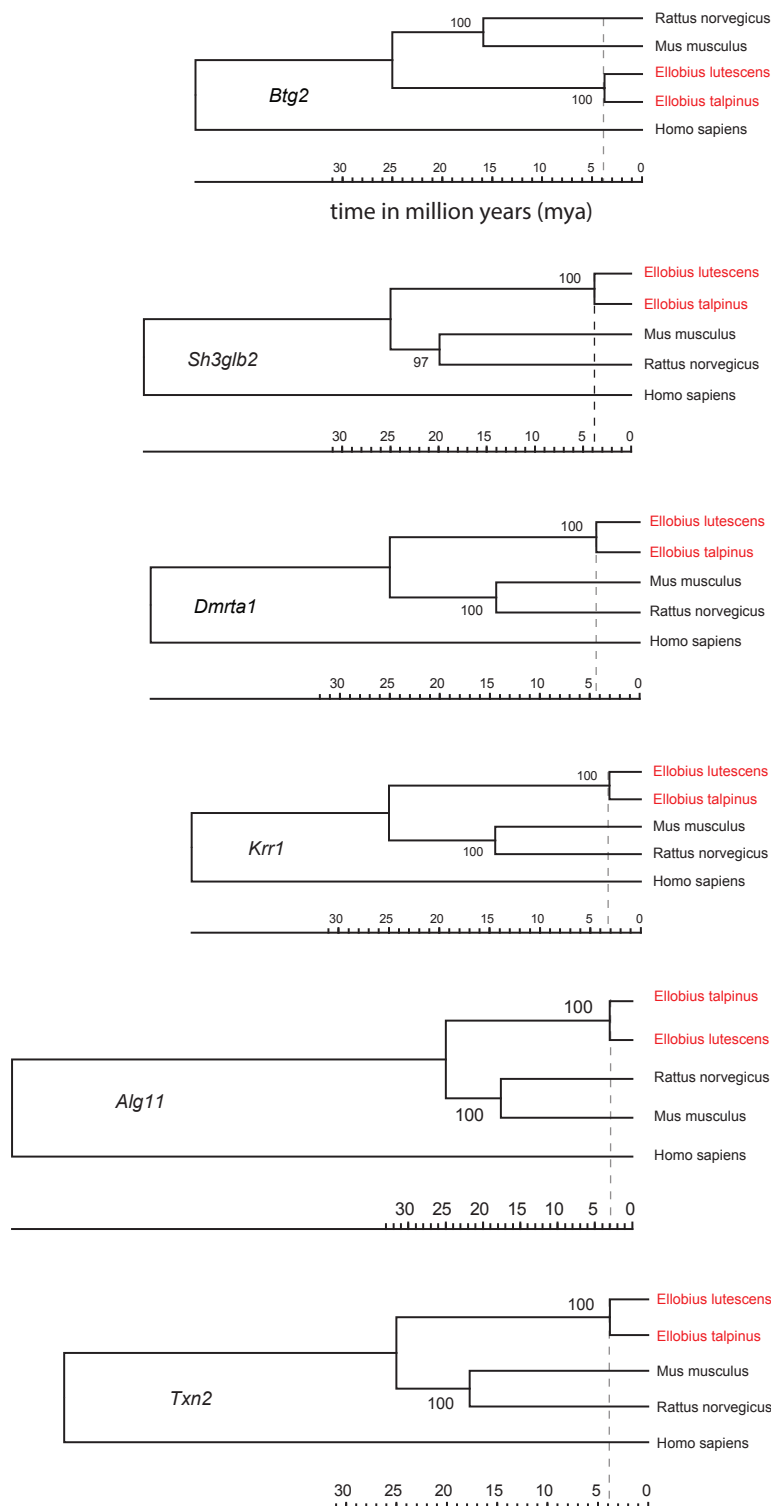

### Supplemental Figure S1: Evolutionary divergence of *E. lutescens* and *E. talpinus*

Dendrograms were composed for the gene sequences as indicated, representing orthologs in *H. sapiens*, *M. musculus*, *R. norvegicus*, *E. lutescens* and *E. talpinus*. Bootstrap values are shown on two nodes for each gene. To estimate the divergence time of *Ellobius* species, we first defined a calibration point, for which we aimed at the best estimate of the divergence time of the placental families Muridae (which includes mouse and rat) and Cricetidae (which includes *Ellobius*). From analysis of a molecular supermatrix, Meredith et al. (2011) arrived at a divergence time of these two families around the Oligocene/Miocene boundary, 23 Mya. Using a similar approach focused on rodents, Fabre et al. (2012) proposed a divergence time towards the end of the Oligocene. Using fossil calibration points, Wu et al. (2012) calculated a mean divergence time for Muridae and Cricetidae of 23.4 Mya. Based on the above, we set the calibration point, the divergence time between Muridae and Cricetidae, at 25 Mya. For several DNA sequences, this resulted in an estimated divergence time between mouse and rat around 20-15 Mya, and between *E. lutescens* and *E. talpinus* around 4-3 Mya. The divergence between mouse and rat has been dated at maximally 12.2 Mya (Wu et al. 2012), and we therefore consider 4-3 Mya as a maximum estimate of the divergence time between *E. lutescens* and *E. talpinus*. For *Xist*, sequence information was available also for *E. fuscocapillus*, in addition to that for *E. lutescens* and *E. talpinus*. The composed phylogenetic tree, using the 25 Mya calibration point, shows that *E. lutescens* and *E. fuscocapillus* shared a common ancestor less than 1 Mya (Figure 1).

#### References:

- Fabre PH, Hautier L, Dimitrov D, Douzery EJ. 2012. A glimpse on the pattern of rodent diversification: a phylogenetic approach. *BMC evolutionary biology* **12**: 88.
- Meredith RW, Janecka JE, Gatesy J, Ryder OA, Fisher CA, Teeling EC, Goodbla A, Eizirik E, Simao TL, Stadler T et al. 2011. Impacts of the Cretaceous Terrestrial Revolution and KPg extinction on mammal diversification. *Science* **334**: 521-524.
- Wu S, Wu W, Zhang F, Ye J, Ni X, Sun J, Edwards SV, Meng J, Organ CL. 2012. Molecular and paleontological evidence for a post-Cretaceous origin of rodents. *PloS one* **7**: e46445.
