# Supplementary material for: Genomes of Ellobius species provide insight into the evolutionary dynamics of mammalian sex chromosomes
Source: HighWire-hosted journal article supplement (doi:10.1101/gr.201665.115), 2016-08-10
Supplement: Supplemental_Figure_S4.pdf [file Supplemental_Figure_S4.pdf]

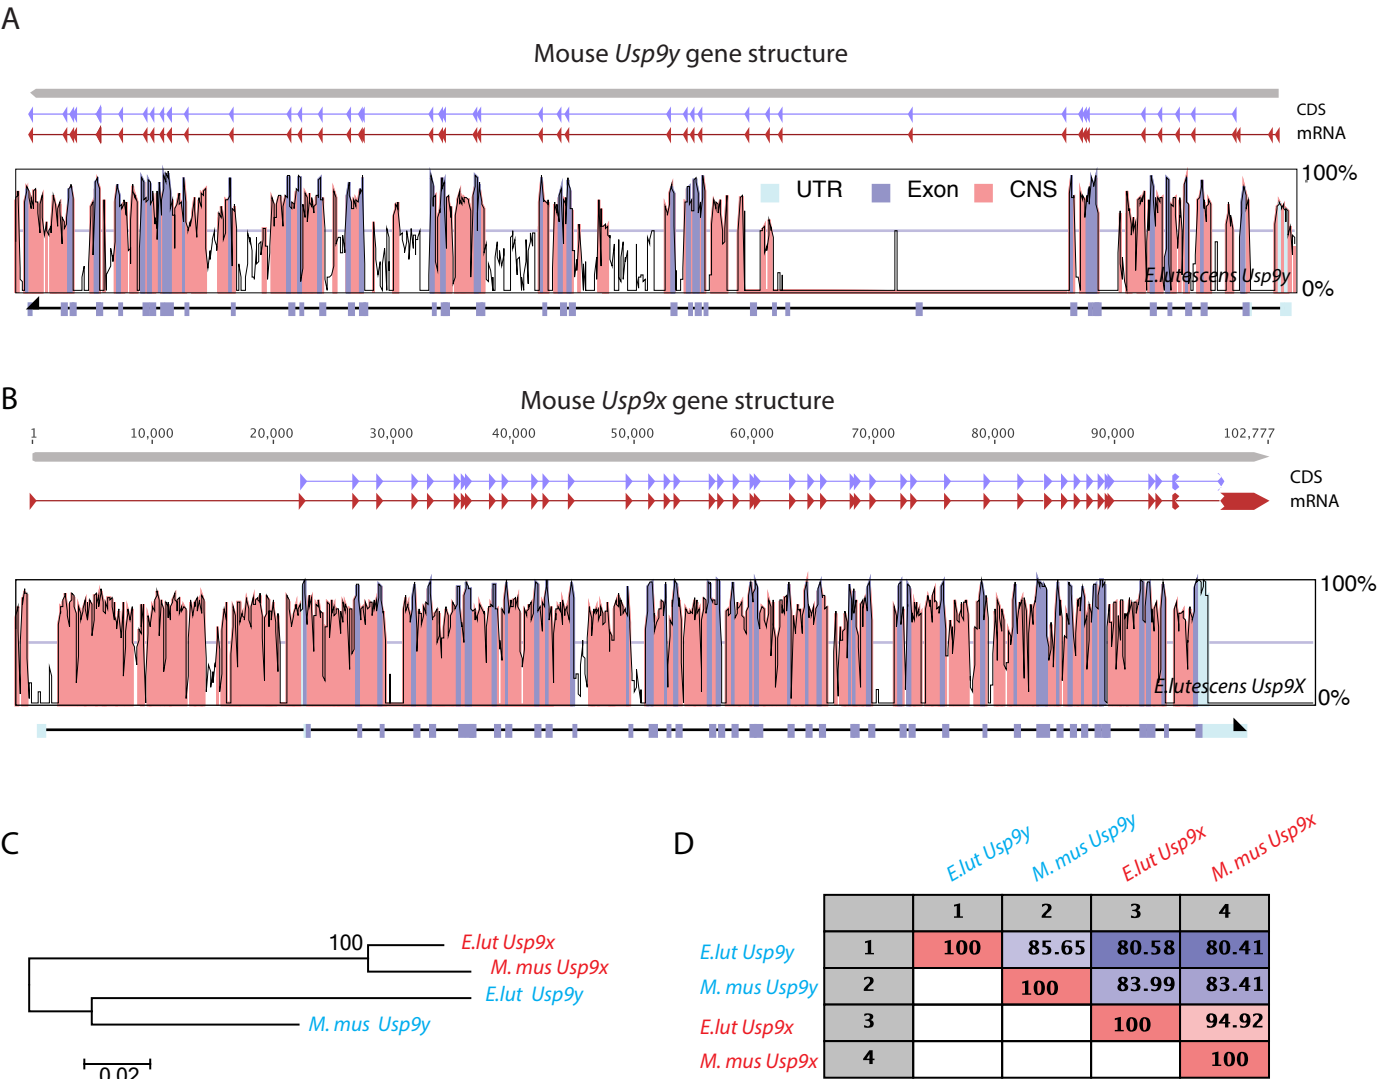

**Supplemental Figure S4: Conservation of *E. lutescens Usp9y***

A) *E. lutescens Usp9y* orthologous region compared to mouse *Usp9y*. The mouse *Usp9y* gene structure, longest mRNA and CDS are shown on top. The gVISTA (<http://genome.lbl.gov/>) software package was used to find the *E. lutescens* and *E. talpinus Usp9y* orthologous regions in mouse. In gVISTA, query sequence contigs are anchored on the base genome by local alignment matches (and then globally aligned to candidate regions using the AVID program). The Y-axis shows the percentage of sequence identity of *E. lutescens Usp9y* to that of mouse *Usp9y* sequences. UTR, exons and non coding regions are shown in different colors (exons: dark blue, UTRs: light blue: non-coding: pink). Gaps indicate genome assembly gaps or not conserved regions.

B) *E. lutescens Usp9x* orthologous regions compared to mouse *Usp9x*. Data presentation and alignment were performed as described in A.

C) Phylogenetic relationship between *E. lutescens Usp9y* (3707 bp) and *Usp9x* (10017 bp) and the orthologous regions of the mouse *Usp9y* and *Usp9x* cDNAs (based on mRNA sequences). Bootstrap value is shown on one node.

D) Alignment percentage identity of *E. lutescens Usp9y* and *Usp9x* with mouse *Usp9y* and *Usp9x* cDNAs, using the sequences indicated in C.
