# Supplementary material for: Genomes of Ellobius species provide insight into the evolutionary dynamics of mammalian sex chromosomes
Source: HighWire-hosted journal article supplement (doi:10.1101/gr.201665.115), 2016-08-10
Supplement: Supplemental_Tables.docx [file Supplemental_Tables.docx]

**Supplemental Table 1: Raw sequence yield summary**

|  | insert size | yield | type | length | platform |
| --- | --- | --- | --- | --- | --- |
| Male  *E. lutescens* | 175 bp | 48.8 Gbp | paired end | 105 | GA |
| 175 bp | 102.4 Gbp | paired end | 100 | HiSeq2000 |
| 300 bp | 43.4 Gbp | paired end | 101 | HiSeq2000 |
| 500 bp | 23.5 Gbp | paired end | 101 | HiSeq2000 |
| 5 kbp | 26.0 Gbp | mate pair | 76 | GA |
| 5 kbp | 18.6 Gbp | mate pair | 101 | HiSeq2000 |
| 2.5 kbp | 27.8 Gbp | mate pair | 76 | GA |
| 2.5 kbp | 21.5 Gbp | mate pair | 101 | HiSeq2000 |
| 10 kbp | 25.3 Gbp | mate pair | 101 | HiSeq2000 |
| Female  *E. lutescens* | 400bp | 83.4 Gbp | paired end | 101 | HiSeq2000 |
| Female  *E. talpinus* | 400bp | 129 Gbp | paired end | 101 | HiSeq2000 |

**Supplemental Table 2: male *E. lutescens* super scaffold statistics**

| Genome builder outcome | N50 (Mb) | # scaffolds (>200kb) | Gap closed  (>200 kb) | Scaffold size (Gb) |
| --- | --- | --- | --- | --- |
| Original | 0.242 | 3366 | NA | 1.33 |
| GB iteration 4 | 1.10 | 1384 | 1982 | 1.67 |
| GB iteration 8 | 3.19 | 1109 | 2257 | 1.97 |

**Supplemental Table 3: male *E. lutescens* RNA sequencing statistics**

| Transcript contigs:>500 bp length |  |
| --- | --- |
| Contig N50: | 2497 |
| Median contig length (bp) | 1137 |
| Average contig length (bp) | 1728.66 |
| Total assembled bases | 242250845 |

**Supplemental Table 4: genome statistics for male *E.lutescens* after *de novo* assembly using ABySS**

|  | contigs (ABySS) | Contigs > 499bp | Scaffold with PE1, 175bp | Scaffold with PE2, 300bp | Scaffold with PE3, 500bp | Scaffold with MP1, 2.5kb | Scaffold with MP2, 5.0kb |
| --- | --- | --- | --- | --- | --- | --- | --- |
| total number (k) | 4448 | 482 | 449 | 333 | 249 | 82 | 58 |
| sum of scaffolds  (Gbp) | 2.6 | 2.3 | 2.3 | 2.3 | 2.3 | 2.3 | 2.3 |
| total number of Ns (kbp) | 1239 | 1234 | 1258 | 4161 | 9448 | 60838 | 93268 |
| sum of no Ns (Gbp) | 2.6 | 2.3 | 2.3 | 2.3 | 2.3 | 2.3 | 2.3 |
| max scaffold size (kbp) | 92.6 | 92.6 | 93.6 | 150.5 | 211.5 | 1332 | 2242 |
| min scaffold size (bp) | 55 | 500 | 500 | 500 | 500 | 500 | 500 |
| average scaffoldsize (kbp) | 0.6 | 4.6 | 5.0 | 6.8 | 9.1 | 28.0 | 40.3 |
| scaffoldN50 (kbp) | 6.8 | 8.2 | 8.9 | 12.8 | 18.3 | 116.1 | 242.1 |

**Supplemental Table 5: genome statistics for male *E.lutescens* after *de novo* assembly using ClCBio**

|  | Contigs (CLCBio) | Contigs > 499bp | Scaffold with PE1, 175bp | Scaffold with PE2, 300bp | Scaffold with PE3, 500bp | Scaffold with MP1, 2.5kb | Scaffold with MP2, 5.0kb |
| --- | --- | --- | --- | --- | --- | --- | --- |
| total number (k) | 835 | 610 | 585 | 446 | 285 | 50 | 25 |
| sum of scaffolds  (Gbp) | 2.1 | 2.1 | 2.1 | 2.1 | 2.1 | 2.1 | 2.1 |
| total number of Ns (kbp) | 5642 | 4632 | 4647 | 9010 | 18115 | 95761 | 136144 |
| sum of no Ns (Gbp) | 2.1 | 2.1 | 2.1 | 2.1 | 2.1 | 2.1 | 2.1 |
| max scaffold size (kbp) | 67.5 | 67.5 | 67.4 | 95.4 | 156.3 | 1561 | 2497 |
| min scaffold size (bp) | 200 | 500 | 500 | 500 | 500 | 500 | 500 |
| average scaffoldsize (kbp) | 2.6 | 3.4 | 3.5 | 4.6 | 7.3 | 42.9 | 87.5 |
| scaffoldN50 (kbp) | 5.2 | 5.3 | 5.6 | 7.7 | 13.0 | 124.4 | 311.0 |

**Supplemental Table 6: genome statistics for female *E. lutescens* and *E. talpinus* after *de novo* assembly, for contigs generated by ABySS**

|  | female E.lutescens | | | female E.talpinus | | | |
| --- | --- | --- | --- | --- | --- | --- | --- |
|  | Contigs , ABySS | Contigs > 199bp | Scaffold with PE1, 400bp | Contigs ABySS | Contigs > 199bp | Scaffold with PE1, 400bp | Scaffold with PE2, 400bp |
| total number of scaffolds (k) | 5817 | 835 | 413 | 10026 | 702 | 412 | 350 |
| sum of scaffolds (Gbp) | 2.5 | 2.2 | 2.2 | 2.9 | 2.2 | 2.2 | 2.2 |
| total number of Ns (kbp) | 979 | 971 | 35048 | 318 | 316 | 18727 | 22285 |
| sum of no Ns (Gbp) | 2.5 | 2.2 | 2.2 | 2.9 | 2.2 | 2.2 | 2.2 |
| max scaffold size (kbp) | 70.5 | 70.5 | 160.3 | 76.3 | 76.3 | 141.6 | 160.1 |
| min scaffold size (bp) | 55 | 200 | 200 | 55 | 200 | 200 | 200 |
| average scaffoldsize (kbp) | 0.4 | 2.6 | 5.3 | 0.293 | 3.2 | 5.5 | 6.5 |
| scaffoldN50 (kbp) | 4.9 | 6.2 | 13.2 | 5.1 | 7.4 | 13.0 | 15.2 |

**Supplemental Table 7: Presence of previously sequenced *E. lutescens* genes in the assembled male *E. lutescens* genome**

| **gene symbol** | **identity (bp)** | **identity (%)** |
| --- | --- | --- |
| *App* | 195 / 195 | 100 |
| *Atrx* | 996 / 998 | 99 |
| *Flna* | 69 / 69 | 100 |
| *Foxl2* | 1622 / 1630 | 99 |
| *Mecp2* | 105 / 106 | 99 |
| *Nr0b1* | 190 / 190 | 100 |
| *Nr5a1* | 463 / 465 | 99 |
| *Opn1mw* | 83 / 84 | 99 |
| *Srsf3* | 332 / 332 | 100 |
| *Xist* | 743 / 745 | 100 |
| *Zfx* | 683 / 683 | 100 |

**Supplemental Table 8: Repeat annotation of the male *E. lutescens* and female *E.talpinus* genomes**

|  | **male E.lutescens** | | | **female E.talpinus** | | |
| --- | --- | --- | --- | --- | --- | --- |
| type of repeats | %relative to  *M. musculus* | % relative to  *R. norvegicus* | %relative to  *H. sapiens* | %relative to  *M. musculus* | % relative to  *R. norvegicus* | %relative to  *H. sapiens* |
| SINEs | 8.5 | 8.5 | 2.7 | 8.9 | 8.9 | 2.8 |
| LINEs | 10.2 | 10.2 | 6.1 | 10.4 | 10.3 | 6.2 |
| LTR elements | 9.2 | 9 | 1.4 | 9.5 | 9.3 | 1.4 |
| DNA elements | 1.3 | 1.3 | 0.81 | 1.3 | 1.3 | 0.8 |
| unclassified | 0.4 | 0.5 | 0.01 | 0.42 | 0.5 | 0.01 |
| total interspersed repeats | 29.6 | 29.4 | 11 | 30.5 | 30.4 | 11.2 |
| small RNA | 0.07 | 0.07 | 0.1 | 0.07 | 0.07 | 0.1 |
| satellites | 0.07 | 0.03 | 0.001 | 0.07 | 0.04 | 0.002 |
| simple repeats | 1.2 | 1.3 | 1.5 | 1.4 | 1.4 | 1.6 |
| low complexity | 0.7 | 0.7 | 0.9 | 0.8 | 0.8 | 1 |
| total | 31.6 | 31.5 | 13.5 | 32.8 | 32.7 | 13.9 |

**Supplemental Table 9: Detailed overview of repeats in the male *E. lutescens* genome**

|  | rat |  |  | mouse |  |  | human |  |  |
| --- | --- | --- | --- | --- | --- | --- | --- | --- | --- |
|  | number of elements | length occupied (Mbp) | % | number of elements | length occupied (Mbp) | % | number of elements | length occupied (Mbp) | % |
| SINEs | 1471130 | 201.0 | 8.5 | 1471695 | 201.0 | 8.5 | 530640 | 63.4 | 2.7 |
| Alu/B1 | 581516 | 66.8 | 2.8 | 584370 | 67.1 | 2.9 | 405915 | 49.0 | 2.1 |
| B2-B4 | 709018 | 115.7 | 4.9 | 708450 | 115.7 | 4.9 | 122076 | 14.0 | 0.6 |
| IDs | 69080 | 4.9 | 0.2 | 67372 | 4.8 | 0.2 | - | - | - |
| MIRs | 108963 | 13.1 | 0.6 | 108949 | 13.1 | 0.6 | - | - | - |
| LINEs | 494953 | 238.3 | 10.1 | 493825 | 239.4 | 10.2 | 330515 | 142.5 | 6.1 |
| LINE1 | 428992 | 226.9 | 9.6 | 427877 | 228.0 | 9.7 | 262719 | 131.0 | 5.6 |
| LINE2 | 52717 | 9.5 | 0.4 | 52714 | 9.5 | 0.4 | 53524 | 9.6 | 0.4 |
| L3/CR1 | 10118 | 1.4 | 0.06 | 10117 | 1.4 | 0.06 | 10886 | 1.5 | 0.06 |
| LTR elements | 695700 | 211.8 | 9.0 | 709076 | 215.8 | 9.2 | 128439 | 32.0 | 1.4 |
| ERVL | 89788 | 25.8 | 1.1 | 89663 | 25.7 | 1.1 | 33874 | 95.8 | 0.4 |
| ERVL-MaLRs | 357517 | 105.2 | 4.5 | 351413 | 104.8 | 4.5 | 70556 | 14.9 | 0.6 |
| ERV_classI | 41319 | 13.5 | 0.6 | 37629 | 12.8 | 0.5 | 17662 | 5.0 | 0.2 |
| ERV_classII | 204373 | 66.8 | 2.8 | 227660 | 71.9 | 3.1 | 4910 | 2.2 | 0.1 |
| DNA elements | 151048 | 30.9 | 1.3 | 151048 | 30.8 | 1.3 | 125981 | 19.5 | 0.8 |
| hAT-Charlie | 98348 | 19.0 | 0.8 | 98346 | 19.0 | 0.8 | 73597 | 9.1 | 0.4 |
| TcMar-Tigger | 30265 | 7.2 | 0.3 | 30257 | 7.2 | 0.3 | 34386 | 7.2 | 0.3 |
| Unclassified | 21518 | 10.6 | 0.5 | 22445 | 9.4 | 0.4 | 1576 | 0.3 | 0.01 |
| total interspersed repeats |  | 692.7 | 29.4 |  | 696.7 | 29.6 |  | 257.6 | 11 |
| small RNA | 19398 | 1.6 | 0.07 | 20129 | 1.6 | 0.07 | 48695 | 3.3 | 0.1 |
| satellites | 3714 | 0.8 | 0.03 | 11730 | 1.6 | 0.07 | 193 | 0.03 | 0.001 |
| simple repeats | 531933 | 30.3 | 1.3 | 517314 | 28.7 | 1.2 | 592103 | 34.8 | 1.5 |

**Suppemental Table S10: Detailed overview of repeats in the female *E. talpinus* genome**

|  | rat |  |  | mouse |  |  | human |  |  |
| --- | --- | --- | --- | --- | --- | --- | --- | --- | --- |
|  | number of elements | length occupied (Mbp) | % | number of elements | length occupied (Mbp) | % | number of elements | length occupied (Mbp) | % |
| SINEs: | 1507979 | 201.1 | 8.9 | 1507487 | 201 | 8.9 | 538025 | 63.4 | 2.8 |
| Alu/B1 | 604149 | 68.2 | 3.0 | 607181 | 68.4 | 3.0 | 415391 | 49.35 | 2.2 |
| B2-B4 | 722100 | 114.5 | 5.1 | 720273 | 114.5 | 5.1 | 120118 | 13.8 | 0.6 |
| IDs | 71920 | 5.1 | 0.2 | 70214 | 5 | 0.2 | - | - | - |
| MIRs | 107334 | 13 | 0.6 | 107344 | 13 | 0.6 | - | - | - |
| LINEs: | 544257 | 234.2 | 10.3 | 543293 | 235.2 | 10.4 | 368629 | 139.4 | 6.2 |
| LINE1 | 478637 | 222.8 | 9.8 | 477687 | 223.7 | 9.9 | 301351 | 127.9 | 5.6 |
| LINE2 | 53036 | 9.6 | 0.4 | 53043 | 9.6 | 0.4 | 53790 | 9.7 | 0.4 |
| L3/CR1 | 9599 | 1.4 | 0.1 | 9599 | 1.4 | 0.1 | 10286 | 1.4 | 0.1 |
| LTR elements: | 719800 | 211.8 | 9.3 | 730001 | 215.6 | 9.5 | 127977 | 31.2 | 1.4 |
| ERVL | 90907 | 26 | 1.1 | 91067 | 25.9 | 1.1 | 33716 | 9.5 | 0.4 |
| ERVL-MaLRs | 365118 | 105 | 4.6 | 357961 | 104.5 | 4.6 | 69439 | 14.6 | 0.6 |
| ERV_classI | 44291 | 13.6 | 0.6 | 40467 | 13 | 0.6 | 17883 | 4.8 | 0.2 |
| ERV_classII | 216849 | 66.7 | 2.9 | 237862 | 71.5 | 3.2 | 5583 | 2.0 | 0.1 |
| DNA elements: | 150508 | 30.6 | 1.4 | 150470 | 30.6 | 1.3 | 125094 | 19.2 | 0.8 |
| hAT-Charlie | 98274 | 18.9 | 0.8 | 98249 | 18.9 | 0.8 | 73577 | 8.9 | 0.4 |
| TcMar-Tigger | 30088 | 7.1 | 0.3 | 30082 | 7.1 | 0.3 | 33745 | 7.1 | 0.3 |
| Unclassified: | 21629 | 10.3 | 0.5 | 22507 | 9.5 | 0.4 | 1515 | 0.3 | 0.0 |
| Total interspersed repeats |  | 688 | 30.4 |  | 692 | 30.5 |  | 253.4 | 11.2 |
| Small RNA: | 19547 | 1.6 | 0.1 | 20306 | 1.7 | 0.1 | 48698 | 3.3 | 0.1 |
| Satellites: | 4037 | 0.9 | 0.0 | 11159 | 1.5 | 0.1 | 199 | 0.04 | 0.0 |
| Simple repeats: | 527966 | 32.5 | 1.4 | 515397 | 31.1 | 1.4 | 588864 | 37 | 1.6 |
| Low complexity: | 381162 | 17.6 | 0.8 | 379291 | 17.4 | 0.8 | 481738 | 22.3 | 1.0 |

**Supplemental Table S11: Presence/absence of genes known to be implicated in sex determination pathways**

|  | *Amh* | *Ar* | *Atrx* | *Cbx2* | *Dmrt1* | *Emx2* | *Esr1* | *Fgf9* | *Zfpm2* | *Foxl2* | *Fst* | *Gata4* | *Lhx1* | *Nr0b1* | *Nr5a1* | *Ptgds* | *Rspo1* | *Sox3* | *Sox8* | *Sox9* | *Sry* | *Tcf21* | *Kdm6a* | *Wnt4* | *Wt1* |
| --- | --- | --- | --- | --- | --- | --- | --- | --- | --- | --- | --- | --- | --- | --- | --- | --- | --- | --- | --- | --- | --- | --- | --- | --- | --- |
| *E. lutescens* male | + | + | + | + | + | + | + | + | + | + | + | + | + | + | + | + | + | + | + | + | - | + | + | + | + |
| *E.lutescens* female | + | + | + | + | + | + | + | + | + | + | + | + | + | + | + | + | + | + | + | + | - | + | + | + | + |
| *E. talpinus* female | + | + | + | + | + | + | + | + | + | + | + | + | + | + | + | + | + | + | + | + | - | + | + | + | + |

**Supplemental Table S12: primer sequences for FISH PCR probe**

| Gene name | Forward |  | Reversed | Length |
| --- | --- | --- | --- | --- |
|  |  | |  |  |
| *Zfy1/2* | TTGCTTTGTTGGTGGGTT | | GGCTTGTGTCTTTACAGTTT | 1880 |
| *Zfy1/2* | GGTATGTTTTGCTTTGTTGG | | GGCTTGTGTCTTTACAGTTT | 1888 |
| *Zfy1/2* | CAAAGAGGGTAGTTAAATGG | | GGAAAATGAAGGTATGAAGG | 1770 |
| *Zfy1/2* | CAAAGAGGGTAGTTAAATGG | | TGAAGGTATGAAGGAGATAG | 1764 |
| *Zfy1/2* | CATCCATCGCATTCCATA | | CTCTCTTCCATCTCTTGT | 1594 |
| *Zfy1/2* | AGATAGTAAGGTAAGGAGGA | | AAGGAGAGAATACCCAAG | 1666 |
| *Zfy1/2* | ACAGATAGTAAGGTAAGGAGGA | | TGGAGTGCCTGAAAGGAGA | 1680 |
| *Zfy1/2* | TTGTTGACTGGTATGGGA | | CATGGTGTGGGATAAAGA | 1768 |
| *Usp9y* | CTCTTCCCATTTCTGGTT | | ACCATCAGAATCCACACAA | 1803 |
| *Usp9y* | TTCTGGTTCCTCTCTTCT | | TGTAATAATGTTAGTGGGGG | 1750 |
| *Usp9y* | GAGGAAGTGAGTGAAGGG | | GGGAAGCGAACTGTAAGAGA | 1567 |
| *Usp9y* | GAGGAAGTGAGTGAAGGG | | TGGGCTACATCGGCATTA | 1675 |
| *Usp9y* | ACCACACAACTATCACCA | | GGAGGTTGGAAAGGAAAAG | 1648 |
| *Usp9y* | GACCACACAACTATCACCATTA | | AGGAGGTTGGAAAGGAAAAG | 1650 |
| *Usp9y* | GCTGGCTTTGATCTGTTT | | AAGTGTGAGGTTTTGCATAG | 1315 |
| *Usp9y* | TGGAGTTTTCTGTCTTAGG | | GTGTGAGGTTTTGCATAG | 1350 |
| *Usp9y* | ACTAGTTATTGGAGGAGG | | GGTGGTAATCTAGGGAAA | 1430 |
| *Usp9y* | CTACGTCTGTTCTACACT | | CTCCTATCTGATCCTTCT | 1055 |
| *Usp9y* | GGAACAGTATATCAAGGG | | GGATAGCAAGAACAGTAG | 1859 |
| *Usp9y* | GGAACAGTATATCAAGGG | | GATAGCAAGAACAGTAGGG | 1858 |
| *Usp9y* | GCTGTGTTATGTGTGTGT | | TCTGCCTGCATTGTGTTT | 2082 |
| *Usp9y* | GTCTCTCTTACCCCTGTT | | ATTGTGATCCGTCTTTACC | 1432 |
| *Usp9y* | CATGTCATAAACACACCCAA | | AACATGTGGGAAGCTGAG | 1650 |
| *Usp9y* | GAACTGTGTGGTTGAAGG | | AGGAGAATTGTTGTGAGC | 1552 |
| *Usp9y* | CCATACCTTCCTGAGCATT | | CCTGACTGCTCTTTCGAC | 1733 |
| *Usp9y* | CATGCCTCCATACCTTCC | | ATGCTCACCTTCCTAGACC | 1804 |

Supplemental Table S13: Primer sequences for quantitative RT-PCR and *Eif2s3y* sequencing

| Gene name | Forward |  | Reversed | Length |
| --- | --- | --- | --- | --- |
|  |  | |  |  |
| ***Usp9y*** | CCCTCAGAAAAATGATGGACA | | TGCATTGACACAACAAACCA | 115 |
| ***Usp9x*** | TGAGGAGGAACCAGATGACC | | CTGGGCCTGTATATGGCTGT | 140 |
| ***Eif2s3y*** | TAAAGGGGGTGTAGCTGGTG | | TGAAGATCATTGCGTTCTGC | 165 |
| ***Eif2s3x*** | AAGATCGACCCCACTTTGTG | | GGACCTTTGCTGCTTTCTTG | 163 |
| ***Zfy*** | ATGGTATGCCTTTGGAGCAG | | CCTCGGTAACTGCAGGACAT | 153 |
| ***Zfx*** | AATTGGGGAGCATTCCTTCT | | CAACAATTTGATCCCCATCC | 160 |
| ***Ssty*** | AAGAGTCCTGTGGCCTGCTA | | TCATTGCCTTCTTTCCATCC | 188 |
| ***Actin*** | CAGAGGCATACAGGGACA | | CAGAGCAAGAGAGGCATT | 245 |
| ***Eif2s3yc*** | TGGATGCAGCTCTTCTGT | | CTATTGTTGGCTTGATGGT | 954 |
| ***Eif2s3yg*** | TGTCCTCAACCTCAAACTTCT | | TGCACTAACTCTGCCTCCT | 765 |
| ***Eif2s3y2*** | TGGCATTGCCTGTACAAATATC | | TTAGCCTGACTTTCTTTCACC | 894 |

Supplemental Table S14: amino acid comparison of EIF2S3Y of *M. musculus* (mm), *R. norvegicus* (rn), *S. scrofa* (ss), and *E. lutescens* (el)

|  | mmEIF2S3Y | rnEIF2S3Y | ssEIF2S3Y | elEIF2S3Y  (cDNA) | elEIF2S3Y  (retrogene) |
| --- | --- | --- | --- | --- | --- |
| mmEIF2S3Y | x | 99 | 98 | 93 | 93 |
| rnEIF2S3Y | 99 | x | 98 | 93 | 93 |
| ssEIF2S3Y | 98 | 98 | x | 92 | 92 |
| elEIF2S3Y (cDNA) | 93 | 93 | 92 | x | 96 |
| elEIF2S3Y (retrogene) | 93 | 93 | 92 | 96 | x |

Supplemental Table S15: amino acid comparison of the N-terminus of ZFY of *M. musculus* (mm), *R. norvegicus* (rn), *H. sapiens* (hs), *S. scrofa* (ss), and *E. lutescens* (el)

|  | mmZFY1  (248)* | mmZFY2  (248) | rnZFY1  (248) | hsZFY  (255) | ssZFY  (251) | elZFY1  (240) |
| --- | --- | --- | --- | --- | --- | --- |
| mmZFY1 | x | 92 | 83 | 63 | 63 | 62 |
| mmZFY2 | 92 | x | 86 | 64 | 64 | 64 |
| rnZFY | 83 | 86 | x | 68 | 67 | 69 |
| hsZFY | 63 | 64 | 68 | x | 84 | 55 |
| ssZFY | 63 | 64 | 67 | 84 | x | 55 |
| elZFY | 62 | 64 | 69 | 55 | 55 | x |

*number of N-terminal amino acids in the analysis

Supplemental Table S16: amino acid comparison of the C-terminus of USP9Y of *M. musculus* (mm), *R. norvegicus* (rn), *H. sapiens* (hs), *S. scrofa* (ss), and *E. lutescens* (el)

|  | mmUSP9Y  (1226)* | rnUSP9Y  (1222) | hsUSP9Y  (1225) | ssUSP9Y  (1225) | elUSP9Y  (1193) |
| --- | --- | --- | --- | --- | --- |
| mmUSP9Y | x | 92 | 83 | 83 | 77 |
| rnUSP9Y | 92 | x | 83 | 83 | 77 |
| hsUSP9Y | 83 | 83 | x | 100 | 74 |
| ssUSP9Y | 83 | 83 | 100 | x | 74 |
| elUSP9Y | 77 | 77 | 74 | 74 | x |

*number of C-terminal amino acids in the analysis

Supplemental Table S17: Genome, transcriptome (and gene accession numbers)

| Species | Gene/Genome/description | DNA/RNA | Accession number |
| --- | --- | --- | --- |
| *E. lutescens* | male genome | DNA | LOEQ000000001 |
| *E. lutescens* | female genome | DNA | LOJG000000001 |
| *E. talpinus* | female genome | DNA | LOJH000000001 |
| *E. lutescens* | testis transcriptome | RNA | SRR29830882 |
| *E. lutescens* | *Usp9x* | DNA | KX0002323 |
| *E. lutescens* | *Usp9y* | DNA | KX0002333 |
| *E. lutescens* | *Zfx and Eif2s3x* | DNA | KX0002343 |
| *E. lutescens* | *Zfy* | DNA | KX0002353 |
| *E. talpinus* | *Eif2s3x* | DNA | KX0002363 |
| *E. talpinus* | *Eif2s3y* | DNA | KX0002373 |
| *E. talpinus* | *Zfx* | DNA | KX0002383 |
| *E. talpinus* | *Zfy* | DNA | KX0002393 |
| *E. lutescens* | *Eif2s3x* | RNA | KX0002403 |
| *E. lutescens* | *Eif2s3y* | RNA | KX0002413 |
| *E. lutescens* | *Ssty* | RNA | KX0002423 |
| *E. lutescens* | *Usp9x* | RNA | KX0002433 |
| *E. lutescens* | *Usp9y* | RNA | KX0002443 |
| *E. lutescens* | *Zfx* | RNA | KX0002453 |
| *E. lutescens* | *Zfy* | RNA | KX0002463 |

1<http://www.ncbi.nlm.nih.gov/genome/>,2<http://www.ncbi.nlm.nih.gov/sra>, 3<http://www.ncbi.nlm.nih.gov/genbank/>

Supplemental Table S18: Accession numbers of male *E. lutescens* raw sequence data

| **Description** |  | **Accession numbers1** |
| --- | --- | --- |
| STUDY | PRJNA305123 | SRP074276 |
| SAMPLE | E lutescens M | SRS1419810 |
| EXPERIMENT | Male Ellobius lutescens genome GA172 | SRX1739620 |
| RUN | male Ellobius lutescens genome GA172 | SRR3472299 |
| EXPERIMENT | Male Ellobius lutescens genome HI016 | SRX1739621 |
| RUN | Male Ellobius lutescens genome HI016 | SRR3475727 |
| EXPERIMENT | Male Ellobius lutescens genome GA156 2.5kb | SRX1739622 |
| RUN | Male Ellobius lutescens genome GA156 2.5kb | SRR3472300 |
| EXPERIMENT | Male Ellobius lutescens genome GA156 5kb | SRX1739623 |
| RUN | Male Ellobius lutescens genome GA156 5kb | SRR3472301 |
| EXPERIMENT | Male Ellobius lutescens genome HI053 300bp | SRX1739627 |
| RUN | Male Ellobius lutescens genome HI053 300bp | SRR3492263 |
| EXPERIMENT | Male Ellobius lutescens genome HI053 500bp | SRX1739628 |
| RUN | Male Ellobius lutescens genome HI053 500bp | SRR3497054 |
| EXPERIMENT | Male Ellobius lutescens genome GA130 2.5kb | SRX1739689 |
| RUN | Male Ellobius lutescens genome GA130 2.5kb | SRR3475523 |
| EXPERIMENT | Male Ellobius lutescens genome GA130 5kb | SRX1739690 |
| RUN | Male Ellobius lutescens genome GA130 5kb | SRR3475584 |
| EXPERIMENT | Male Ellobius lutescens genome HI053 2500bp | SRX1747339 |
| RUN | Male Ellobius lutescens genome HI053 2500bp | SRR3497458 |
| EXPERIMENT | Male Ellobius lutescens genome HI053 5000bp | SRX1747340 |
| RUN | Male Ellobius lutescens genome HI053 5000bp | SRR3497460 |

**1**<http://www.ncbi.nlm.nih.gov/sra/>

Supplemental Table S19: Accession numbers of female *E. lutescens* raw sequence data

| **Description** |  | **Accession numbers**1 |
| --- | --- | --- |
| STUDY | PRJNA305123 | SRP074276 |
| SAMPLE | E lutescens F | SRS1432869 |
| EXPERIMENT | female Ellobius lutescens genome | SRX1756255 |
| RUN | female Ellobius lutescens genome TM004 | SRR3497433 |
| EXPERIMENT | female Ellobius lutescens genome_TM005 | SRX1756256 |
| RUN | female Ellobius lutescens genome_TM005 | SRR3497434 |

1<http://www.ncbi.nlm.nih.gov/sra/>

Supplemental Table S20: Accession numbers of female *E. talpinus* raw sequence data

| **Description** |  | **Accession numbers**1 |
| --- | --- | --- |
| STUDY | PRJNA305123 | SRP074276 |
| SAMPLE | E talpinus F | SRS1432935 |
| EXPERIMENT | Female Ellobius talpinus genome TM004 | SRX1756325 |
| RUN | Female Ellobius talpinus genome TM004 | SRR3497470 |
| EXPERIMENT | Female Ellobius talpinus genome TM005 | SRX1756335 |
| RUN | Female Ellobius talpinus genome TM005 | SRR3497471 |

1<http://www.ncbi.nlm.nih.gov/sra/>
